# Supplementary material for: Mutations of the Histone Linker H1-4: An Expanded Cohort and Functional Characterization of Frameshift Mutant H1.4 in Neurons
Source: Research Square preprint supplement (doi:10.21203/rs.3.rs-135774/v1), 2020-12-31
Supplement: Supplementary file 1 [file 1f1281cb7c3f49c51fd527ee.xlsx]

## Sheet: Sheet1
	Patient ID	1	2	3	4	5	6	7	8	9	10
Mutation	cDNA	c.430dupG	c.430dupG	c.430dupG	c.392dupC	c.431dupC	c.430dupG	c.435dup	c.A>G	c.100_101insT	c.265del
	Protein	p.A144Gfs52*	p.A144Gfs52*	p.A144Gfs52*	p.A132Sfs64*	p.A145Gfs51*	p.A144Gfs52*	p.Thr146Hisfs50*	p.M1	p.K34Ifs*13	p.S89Afs140*
	Age at time of visit	8yr	3yr 4mo	2yr 5mo	5yr	11mo	21mo	3yr	11yr 8mo	17yr 3mo	15yr 9mo
		M	F	F	M	F	F	F	F	M	M
Previously reported?		Burkardt 2019	Burkardt 2019	Burkardt 2019	No	Burkardt 2019	Flex 2019	Burkardt 2019	No	No	No
Birth History	Birth weight	9lbs	6lbs 11oz	6lbs 9oz				6lbs 7oz	4309g (97th percentile)
	Birth length	52cm	19.5in	19.75in				18.5in	-
	Birth head circumference	38.5cm	34cm	NA				32.4cm	-
	Premature	No	No	No, but vaccum assisted delivery	38wk- twins	37wk	39wk	34.5wk	38 wk	36 weeks	No
	Other	Low oxygen, low blood glucose	No	No	C section, required oxygen, stayed in NICU for blood surgar and feeding concerns	respiratory arrest with meconium asperation, jaundiced	Breech, C-section	"Cholestasis of pregnancy- not diagnosed until I went into labor early though", prolongued hospital stay, broken collarbone, meconium aspiration	Normal, Mongolian spot		No
Current Growth	Weight	70.8lbs	36lbs	18lbs 3.4oz		Growth within normal limits	10kg	48lbs	51,300g		23600g (at 11yr)
	Height	3.92ft	36in	29.13in			77cm	39.8in	148.7cm		120cm (at 11yr)
	Head circumference	53cm	51.5cm	47cm		47.4	50.7	-	54.2cm		47cm (at 11yr)
Family History (Mental health)	Depression	No	Aunt/Grandparent	Grandparents				No	-	No	2 older male siblings
	Anxiety	No	No	Grandparents				No	-	No
	Bipolar Disorder	No	No	No				No	-	No
	Schizophrenia	No	No	No				No	-	No
	ASD	No	No	No				No	Sister with high functioning autism	No
	Other (mental illness)	No	No	No				No	-	No
Family History (Delay)	Global developmental delay	Cousin	No	No				No	-	No	2 older male siblings
	Speech Delay	Cousin	No	No	brother, speech difficulties			No	-	No	2 older male siblings
	Motor Delay	Cousin	No	No				No	-	mild motor delay	2 older male siblings
	Other	Cousin- Angelman syndrome and Trisomy 21	No	No				No	-	No
In infancy	Muscle weakness	low muscle tone, trouble feeding, floppiness, silent aspiration, chin and cheek support requiresd	Low muscle tone, trouble feeding, hypotonia	No		Exhaggerated moro reflex, strength and head control both good	"tone wihtin normal limits", hypotonia	low muscle tone, trouble feeding/delayed swallow, hypotonia	Trouble drinking fluids		No
Note of delays in medical records				"global developmental delay", "failture to thrive:	"developmental delay", speech and language delay				moderate intellectual disability, speech delay		Speech delay
Developmental milestones (movement)	Sit without support	17mo	7.5mo	13mo	"crawled at 15mo, stood unaided at 19mo"	Too young	"Motor delay"	6-8mo	-
	Pull to stand	22mo	25mo	18mo				-	-
	Walk without support	3yr	prior to 24mo	25mo	19mo			21mo	13mo	4yr	12mo
	Speak first meaningful single words	24-36mo	18mo	18mo		At 11mo- no babbling		12mo	-
	speak phrases	N/A	N/A	25mo				30mo, currently still working on phrases- mainly 2-3 words currently at 4	2 words together at 3yr
	Current vocabulary skills	Several word approximation sounds, not forming sentences	Limited spoken words (apraxia- lots of approximations)	Word usage, not forming sentences	Short phrases		Cooing, no babbling during visit	2-3 word phrases, can perform rehearsed sentences	Sentences by 4 yr	Full sentences, easily. Typically developed	Broken sentences
Regression	Language	No	No	No				No	No, plateau by 18-36mo	No	No
	Motor	No	No	No				No	-	No	No
Current medical survey (physical)	Facial features	Broad nasal bridge, down slanting palebral fissures, bitemporal narrowing, full cheaks	High hairline, wide nose bridge, elongated face, small/deep set eyes, suture line in middle of forhead, biparietal narrowing ,intermitten esotropia, bulbous nose, down-turned corners of the mouth, micrognathia, overfolded hear helices	abnormal shaped head, dysmorphic features, epicanthic folds, earlobe fold	epicanthal folds, frontal bossing, macrocephaly	High forehead, wide spaced eyes, lower set eats	Macrocephaly, dysmorphic features, square face, low anterior hairline	"Large forhead with bump from early closure of coronal suture (checked at yrs and deemed ok)"	Broad nasal tip, thick alae nasi, accentuated cupid's bow, large fleshy earlobes	Long face but overall non dysmorphic	Locked Jaw
	Sight	Strabismus, Astigmatisim, wears glasses	Strabismus, Astigmatisim	intermitten alternating esotropia		astigmatism- doesn’t track or follow	Myopia, congenital nearsightedness	slight astigmatism, near sighted	Wears glasses, myopia, no astigmatism	No	No
	Hearing	Loss- otitis media	Initially failed hearing tests (right sided hearing loss), fine now	Chronic ear infections- tubes placed	Chronic ear infections, passed hearing test		Bilateral sensorineural hearing loss at new born screening	No	No	No	Hearing loss, bilateral 250 to 1000dB
	Muscle	Low tone, floppiness, hypotonia	Decreased muscle tone of the face and torso, increased muscle tone of the limbs, trouble swallowing (no esophogeal motility), ulnar deviation of both hands	Minor low muscle tone, floppiness, hypotonia	Uncoordinated and loses balance	Feet rolling ,fine for head control and general strength	Hands with single transverse palmar creases, toes overlapping, currently stable with sitting	No	No	No	No
	Bone	Questiionable osteopania	micrognathia., overlapping toes, externally rotated valvus feet, short second metatarsals	Pectus excavatum		c curve in spine noted, toe contractures	abnormally shaped occipital bone on CT, mild multiphasic thoracic and lumbar scoliosis, hip dysplasioa (resolved)	No	bilateral 5th digit Clinodactyly, mild dental crowding	Bilateral genu valgum	ankylosis of both jaw joints
	Cardiac	PDA, VSD	small atrial septal defect- closing without intervential	Atrial Septal Defect	coarctation of the aorta		Atrial septal defect	No	No	No	No
	Digestive	Food intolerances	Rumination, slow digestive track, esophogeal motility issues	Mom reported "No", but medical reports says gastroesophaegeal reflux		constipation/bloating	GERD	Bloating, loose stools	No	No	No
	Sexual Organ	Undeveloped- Undescended testes (corrected with surgery), small penis, short fibrous chords attached to testes	Apparently normal developing	Normally developed				Normally developed		Normally developed	Normally developed
Current medical (Neurophysiological)	Seizure	No	No, experiences episodic paroxyamal events (dizziness)	1 febrile seizure				No	No	No	No
	MRI	Bilateral choroid plexus cysts, possible pachygyria, tiny dead spots (possibly movement coordination area)	Thinning of corpus callosum and relative paucity of white matter. Small artifact in caudothalamic groove- possible residua of prior germinal matrix hemorrhage. Paranasal sinus underdeveloped	Mild right posterior plagiocephaly (may be positional), No suture abnormalitiy identified		slightly delayed myelination @6mo	dolichocephaly, skull radiographs or CT would be healpful to further evaluate for sagittal craniosynostonsis, mild prominence of the subarachnoid filuid spaces, 3rd ventricular enlargement (mild- right mastoid fluid, inflammatory or congestive in nature)	"MRI in NICU because progress was slow, CT scan at 10months and CT at 14months because of fall on head"	at 9yr- Normal	No	Previous CT for jaw joint
Current medical (Behavioral)	ADD	Yes	No	No				No	No	No	Mild
	ADHD	Yes	No	No				No	No	No
	CD (conduct disorder)	No	No	No				No	-	No	No
	Agression	No	No	No				No	-	No	No
	Anxiety	Yes	Yes, associated with movement	Yes, associated with movement				No	-	No
	Sensory Issues	Yes	Avoidence of textures	Avoidence of textures and experiances				Sensitive to loud noises	hyperreactivity to sensory input	No	No
	Phobias	Animals, doctors, anything new or out of routine, anything related to medical hospitals, haircuts	No	bugs, movement (balance changes)				Animals ("loves to read about and watch from a distance but terrified at close range"	-		No
	ASD diagnosis	"Autistic like tendecnies but not diagnosed with autism"	Yes (was a challenge to get)	Yes				Yes (delayed language and motor skills, but social interactions are good)	Yes- deficits in social communication and interaction, flat affect, shows little emotion, deficity in social-emotional reprocity, nonverbal communication, and relationship development and maintenance, Also has repetitive behaviors, fixations, and hyperreactivity to sensory input	No- tested for DD following late speech, failed to meet diagnosis criteria for DD or ASD	IQ testing 86, difficulty with text memorization and school performance
Other:		hydronephrasis of left kidney (corrected with surgery), otitis media (grommets used to help), before 6 years of age required oxygen while sleeping	Extensive IEPs and school reports for management of the disorder. Carries mutation in DEAF1 as well. "Sometimes does something then will stop for a couple weeks and start doing it again", social and happy child with no behavioral issues	IEPs available	22q11.23 duplication, IEPs available, formal tests administered	Seemed to be "in a fog" for first 3 months, horrible sleeper, frequent thrush	Head CT- colichocephaly with patent sagittal suture, mild asymmetry in the coronal sutures	Concieved with copper IUD in place, Additional mutations in AMPD1, PMM2 (maternal interitence), PAH (Paternally inherited); VUS in DOK7, TTN	Cyst on hip	End-stage renal disease, nephronophthisis. Family history is significant for enuresis nocturna. NPHP1 homo deletion	Short stature
