# Supplementary material for: Mutations of the Histone Linker H1-4: An Expanded Cohort and Functional Characterization of Frameshift Mutant H1.4 in Neurons
Source: Research Square preprint supplement (doi:10.21203/rs.3.rs-135774/v1), 2020-12-31
Supplement: Supplementary file 2 [file 956902acf089b58e0b217444.xlsx]

## Sheet: Frameshifts in H1s
Supplemental File 2_ Summary of mutations in H1 family members_Frameshifts in H1s_Frameshift mutations identified in Baylor Clinical ES database
ID	Family ID	Sex	Age	De-ID phenotype	Solved	Solved By	Posn	Variant type	Gene	Isoform	Location	Nucleotide	AminoAcid	Zygosity	Comments	esp5400	polyphen2	Format
9043784	3783281	M	0.37647	suspected neonatal meningitis, severe microcephaly, seizure like activity, abnormal EEG/MRI, developmental delay, irritability, high palate, abnormal plasma amino acids and acylcarnitine profile, elevated gamma-glutamyltransferase activity, stools with blood and mucus.	Unsolved		Chr6: 26017933	Possible loss-of-function	HIST1H1A	NM_005325.3	exon1	c.27dupC	p.A10Rfs*7	Het	Novel variant	N/R N/R	N/A/ N/A	0/1:48,45:93:99:1233,0,1230:30,18,24,21
8943559	3622657	F	0.130268	intrauterine growth retardation, failure to thrive, microcephaly, patent foramen ovale, pericardial effusion, supernumerary nipple, bifid thumb, hand polydactyly, diarrhea, thrombocytopenia, fever, and hematuria. Family history is significant for heart murmurs and/or polydactyly in multiple family members on the paternal side.	Unsolved		chr6: 26017933	Possible loss-of-function	HIST1H1A	NM_005325.3	exonic	c.27del	p.A10Pfs*10	Het	rs776702168; Mother is heterozygous. Father is negative.	3/280028 1/30594	N/A/N/A
9029815	3765158	F	0.507561	absent ductus venosus, pectus excavatum, multiple hemangioma, congenital heart defects, and dysmorphic features.	Probably Solved	A heterozygous c.848G>A (p.R283Q) likely pathogenic variant in the LZTR1 gene was detected in this individual. Defects in LZTR1 are the cause of Noonan syndrome 10 (NS10) [MIM:616564], a form of Noonan syndrome, a disease characterized by short stature, facial dysmorphic features such as hypertelorism, a downward eyeslant and low-set posteriorly rotated ears, and a high incidence of congenital he…	Chr6: 26017894	Possible loss-of-function	HIST1H1A	NM_005325.3	exon1	c.66_67insC	p.K23Qfs*7	Het	rs771962054 Mother is heterozygous. Father is negative.	1/121392 N/R	N/A/ N/A	0/1:50,50:100:99:1694,0,1700
9233611	4235926	M	10.099	developmental delay, speech delay, intellectual disability and obesity. Family history is positive for an older brother with attention deficit hyperactivity disorder, a younger brother with gross motor delay and speech delay, and a maternal uncle with speech delay.	Unsolved		Chr6: 26017894	Possible loss-of-function	HIST1H1A	NM_005325	exon1	c.66_67insC	p.K23fs	Het	Seen in ExAc database	N/R N/R	N/A/ N/A	1/0:47:56:103:.
9201784	3978362	F	21.0967	a history of idiopathic cognitive and language delay, staring spells and episodes of aggression.	Unsolved		Chr6: 26017760	Possible loss-of-function	HIST1H1A	NM_005325	exon1	c.200delA	p.K67fs	Het	rs35510717	N/R N/R	N/A/ N/A	1/0:24:70:94:.
9278464	4094379	F	6.75828	born prematurely at 34 weeks and has clinical developmental delay, autism and intellectual disability. Body fluid metabolite testing suggested mitochondrial dysfunction. Family history is noted that the fraternal twin sister has similar presentations.	Unsolved		Chr6: 26017542	Possible loss-of-function	HIST1H1A	NM_005325	exon1	c.419_420insG	p.K140fs	Het	Novel mutation	N/R N/R	N/A/ N/A	1/0:87:74:161:.
9055614	3796256	M	5.27215	language delay, autism spectrum disorder, and borderline macrocephaly. Family history is significant for a brother with autism and borderline macrocephaly.	Unsolved		Chr6: 26017541	Possible loss-of-function	HIST1H1A	NM_005325.3	exon1	c.419_420insT	p.K140Nfs*7	Het	rs771012273 Mother is heterozygous. Father is negative.	8/121402 N/R	N/A/ N/A	0/1:85,79:164:99:2677,0,3314
9030342	3765967	F	4.49688	prematurity, failure to thrive, short stature, motor developmental delay, speech and language delay, hypopigmented fundus, dysmorphic features, macrocephaly, submucous cleft palate, asthma and wheezing, recurrent otitis media, atrial septal defect, mitral valve thickening and regurgitation, gastroesophageal reflux, generalized hypopigmentation of hair and skin, eczema, skeletal abnormalities, pec…	Unsolved		Chr6: 26017541	Possible loss-of-function	HIST1H1A	NM_005325.3	exon1	c.419_420insT	p.K140Nfs*7	Het	rs771012273	8/121402 N/R	N/A/ N/A	0/1:92,89:181:99:3050,0,3074:40,52,49,40
8963834	3671617	M	0.152077	premature birth, polyhydramnios, edema, hydrocephalus, motor delay, generalized hypotonia, macrocephaly, hypertelorism, low-set ears, depressed nasal bridge, periorbital edema, wide intermamillary distance, cryptorchidism, hydrocele testis, sacral dimple, overlapping toe, small nail, skin tags, pulmonary artery stenosis, respiratory failure, patent foramen ovale, hypoglycemia, hyperbilirubinemia,…	Unsolved		chr6: 26017538	Possible loss-of-function	HIST1H1A	NM_005325.3	exonic	c.421_422del	p.K141Gfs*5	Het	rs760921692; Mother is negative. Father is heterozygous.	16/251318 16/34590	N/A/N/A	16/251318 16/34590
8978160	3693467	M	1.00024	aplasia of the lungs, choanal stenosis, dextrocardia, patent ductus arteriosus, hypoplastic pulmonary veins, horseshoe kidney, anal atresia, hypertelorism, periorbital edema, preauricular skin tag, abnormality of the pinna, prominent nasal bridge, micrognathia, and clinodactyly.	Unsolved		chr6: 26056015	Novel	HIST1H1C	NM_005319.3	exonic	c.642G>C	p.*214Yext*6	Het		1/228090 1/26260	N/A/N/A
9006005	3776856	F	32.8093	persistent intermittent chest pain and troponin elevation, left ventricular wall dysfunction, myocardial fibrosis, mild endothelial dysfunction, and sinus tachycardia concerning for nonischemic cardiomyopathy or myocarditis and depression and anxiety.	Solved	A heterozygous c.1273C>T (p.R425X) pathogenic variant in the DSP gene was detected in this individual, which was confirmed by Sanger sequencing. Sanger sequencing also showed that the mother is negative for this change. The c.1273C>T (p.R425X) has been previously reported in one individual with personal and family history of arrhythmogenic right ventricular cardiomyopathy (PMID 22555271). Defects…	Chr6: 26056148	Possible loss-of-function	HIST1H1C	NM_005319	exon1	c.508dupG	p.V170fs	Het	Novel variant	N/R N/R	N/A/ N/A	1/0:136:123:259:.

## Sheet: CNVs
Supplemental File 2_ Summary of mutations in H1 family members_Frameshifts in H1s_CNVs identified in Baylor Clinical ES database
Array	ID	Age	Sex	Indication	Inheritance	chr	min start	min stop	max start	max stop	value	Min size (kb)	genes	Other significant findings
CMA-HR+SNP(V11.2)	9592675	2y	F	Developmental Delay, Dysmorphic Features, Failure to Thrive, Other	Unknown	6	26041316	26644043	26008435	27049337	GAIN	602.727	HIST1H2BB,HIST1H3C,HIST1H1C,HFE,HIST1H4C,HIST1H1T,HIST1H2BC,HIST1H2AC,HIST1H1E,HIST1H2BD,HIST1H2BE,HIST1H4D,HIST1H3D,HIST1H2AD,HIST1H2BF,HIST1H4E,HIST1H2BG,HIST1H2AE,HIST1H3E,HIST1H1D,HIST1H4F,HIST1H4G,HIST1H3F,HIST1H2BH,HIST1H3G,HIST1H2BI,HIST1H4H,BTN3A2,BTN2A2,BTN3A1,BTN2A3,BTN3A3,BTN2A1,LOC285819,BTN1A1,HCG11,HMGN4,ABT1,ZNF322A,	Small deletion in SDCCAG8; ~800kb 22q13.32q13.33 duplication
CMA-HR+SNP(V11.2)	9606985	0m	M	Ambiguous Genitalia	Unknown	6	27618620	27936769	27574121	28020272	GAIN	318.149	LOC100507173,LOC100131289,HIST1H2BL,HIST1H2AI,HIST1H3H,HIST1H2AJ,HIST1H2BM,HIST1H4J,HIST1H4K,HIST1H2AK,HIST1H2BN,HIST1H2AL,HIST1H1B,HIST1H3I,HIST1H4L,HIST1H3J,HIST1H2AM,HIST1H2BO,OR2B2,OR2B6,	arr 4q13.3(71179844-71275324)x1
CMA-HR+SNP(V9.1.1)	9688312	2y	M	Encephalopathy	Unknown	6	27574062	27936769	27487912	28020272	GAIN	362.707	LOC100507173,LOC100131289,HIST1H2BL,HIST1H2AI,HIST1H3H,HIST1H2AJ,HIST1H2BM,HIST1H4J,HIST1H4K,HIST1H2AK,HIST1H2BN,HIST1H2AL,HIST1H1B,HIST1H3I,HIST1H4L,HIST1H3J,HIST1H2AM,HIST1H2BO,OR2B2,OR2B6,	arr Xq22.2(103218083-103223499)x2;arr 9q22.1q31.1(90581746-105750176)x2 hmz
CMA (Oligo V8.1.1)	9588769	4y	F	Autism	Unknown	6	25718402	26283958	25642836	26399499	GAIN	565.556	HIST1H2AA,HIST1H2BA,SLC17A4,SLC17A1,SLC17A3,SLC17A2,TRIM38,HIST1H1A,HIST1H3A,HIST1H4A,HIST1H4B,HIST1H3B,HIST1H2AB,HIST1H2BB,HIST1H3C,HIST1H1C,HFE,HIST1H4C,HIST1H1T,HIST1H2BC,HIST1H2AC,HIST1H1E,HIST1H2BD,HIST1H2BE,HIST1H4D,HIST1H3D,HIST1H2AD,HIST1H2BF,HIST1H4E,HIST1H2BG,HIST1H2AE,HIST1H3E,HIST1H1D,HIST1H4F,HIST1H4G,HIST1H3F,HIST1H2BH,HIST1H3G,HIST1H2BI,	None
CMA (Oligo V8.1.1)	9588748	4y	F	Autism	Unknown	6	25718402	26283958	25642836	26399499	GAIN	565.556	HIST1H2AA,HIST1H2BA,SLC17A4,SLC17A1,SLC17A3,SLC17A2,TRIM38,HIST1H1A,HIST1H3A,HIST1H4A,HIST1H4B,HIST1H3B,HIST1H2AB,HIST1H2BB,HIST1H3C,HIST1H1C,HFE,HIST1H4C,HIST1H1T,HIST1H2BC,HIST1H2AC,HIST1H1E,HIST1H2BD,HIST1H2BE,HIST1H4D,HIST1H3D,HIST1H2AD,HIST1H2BF,HIST1H4E,HIST1H2BG,HIST1H2AE,HIST1H3E,HIST1H1D,HIST1H4F,HIST1H4G,HIST1H3F,HIST1H2BH,HIST1H3G,HIST1H2BI,	None

## Sheet: H1-1
Supplemental File 2_ Summary of mutations in H1 family members_H1-1_Summary of array of mutations in H1-1
Count of ID
	Grand Total	Inherited variant						Variant of unknown origin
Row Labels		VUS	In frame indel	Frameshift	Missense	Silent	Total	VUS	In frame indel	Frameshift	Missense	Silent	Total
c.*16T>A	2	2					2
c.*20C>T	1							1					1
c.*3T>A	1	1					1
c.*4C>A	1	1					1
c.*50C>G	1	1					1
c.111A>T	54				12		12				42		42
c.115G>C	2										2		2
c.11C>G	4				1		1				3		3
c.125C>T	30				9		9				21		21
c.127G>A	4										4		4
c.137T>C	1										1		1
c.142G>C	1										1		1
c.148G>A	162				20		20				141		142
c.153T>C	1										1		1
c.155C>T	4										4		4
c.158C>T	10				5		5				5		5
c.159_161del	2								2				2
c.15G>A	9					5	5					4	4
c.161C>G	1										1		1
c.166_168del	7								7				7
c.166G>A	2										2		2
c.169C>T	1										1		1
c.172G>A	2										2		2
c.173G>A	5				1		1				4		4
c.186G>C	2				1		1				1		1
c.187_193del	1								1				1
c.193C>T	10				5		5				5		5
c.194T>C	2										2		2
c.1A>G	1	1					1
c.200delA	1									1			1
c.201G>A	2											2	2
c.201G>T	1										1		1
c.203C>A	53				5		5				48		48
c.203C>T	2										2		2
c.20C>T	1										1		1
c.22G>A	1										1		1
c.233A>G	1										1		1
c.234G>A	1											1	1
c.239_241del	2		1				1		1				1
c.240C>T	1											1	1
c.253C>G	1										1		1
c.253C>T	1										1		1
c.257G>C	1										1		1
c.259A>C	3										3		3
c.261T>G	1										1		1
c.264G>A	6					2	2					4	4
c.266G>A	3				1		1				2		2
c.267C>T	1					1	1
c.268C>T	1					1	1
c.275G>A	1										1		1
c.276C>T	1					1	1
c.279G>A	1					1	1
c.27del	1			1			1
c.27dupC	1									1			1
c.281G>A	1				1		1
c.28G>A	4				3		3				1		1
c.294_297del	1								1				1
c.298A>C	1				1		1
c.302G>C	1										1		1
c.306C>T	1					1	1
c.307G>A	1										1		1
c.307G>C	3				1		1				2		2
c.30C>T	1					1	1
c.31G>T	1										1		1
c.333C>T	28					2	2					26	26
c.337_339del	1								1				1
c.340G>C	1										1		1
c.341C>T	3										3		3
c.355A>G	1										1		1
c.35C>T	11				2		2				9		9
c.365G>A	1				1		1
c.366C>T	1											1	1
c.369C>T	1					1	1
c.379G>C	1										1		1
c.40_42del	6								6				6
c.402_431del	1								1				1
c.414G>C	1										1		1
c.419_420insG	1									1			1
c.419_420insT	2			1			1			1			1
c.421_422del	1			1			1
c.425C>T	1										1		1
c.432G>A	1					1	1
c.440A>G	1										1		1
c.445_446del	1								1				1
c.447C>T	2											2	2
c.451A>G	6				2		2				4		4
c.465G>C	1										1		1
c.465G>T	1				1		1
c.471A>G	1											1	1
c.472A>G	9				2		2	1			6		7
c.473A>G	1										1		1
c.479C>T	1				1		1
c.488G>A	1				1		1
c.500A>C	1										1		1
c.500A>G	2										2		2
c.514C>T	1										1		1
c.523G>A	1										1		1
c.534G>T	1										1		1
c.538G>A	1										1		1
c.539_541del	2								2				2
c.539_541delTAG	1								1				1
c.53C>T	1										1		1
c.541G>C	5										5		5
c.544A>G	1				1		1
c.550C>T	2										2		2
c.553G>A	1										1		1
c.55T>G	2				1		1				1		1
c.57A>C	1										1		1
c.581C>T	1				1		1
c.589G>T	1										1		1
c.59C>T	1										1		1
c.5C>T	1										1		1
c.615C>T	1					1	1
c.616A>T	1										1		1
c.638A>G	1				1		1
c.66_67insC	2			1			1			1			1
c.69G>A	1					1	1
c.69G>C	2										2		2
c.71C>A	2										2		2
c.71C>T	1				1		1
c.72A>G	3					1	1					2	2
c.79C>T	1				1		1
c.88G>A	3										3		3
c.88G>C	2										2		2
c.89C>T	2				1		1				1		1
c.95C>T	2										2		2
c.98C>T	2				1		1				1		1
c.99C>T	3											3	3
c.C125T	1										1		1
c.G376T	1										1		1
Grand Total	574	6	1	4	84	20	115	2	24	5	380	47	459
		VUS	In frame indel	Frameshift	Missense	Silent	Total	VUS	In frame indel	Frameshift	Missense	Silent	Total

## Sheet: H1.5
Supplemental File 2_ Summary of mutations in H1 family members_H1-5_Summary of array of mutations in H1-5
	Grand Total	De novo mutation		Inherited variant						Variant of unknown origin
Row Labels		Missense	Total	VUS	In frame indel	Frameshift	Missense	Silent	Total	VUS	In frame indel	Frameshift	Missense	Silent	Total
c.-15C>T	3			2					2	1					1
c.-4C>T	1			1					1
c.-5C>T	7			4					4	3					3
c.-7T>C	1									1					1
c.-9C>T	12			5					5	7					7
c.100_102del	41				11				11		30				30
c.101C>T	1												1		1
c.105G>T	1												1		1
c.120G>A	2							1	1					1	1
c.121C>T	1												1		1
c.128T>C	1												1		1
c.12C>T	1													1	1
c.138G>T	1							1	1
c.139A>G	1												1		1
c.151G>A	2												2		2
c.153G>A	1													1	1
c.15T>G	2							1	1					1	1
c.161C>G	2												2		2
c.161C>T	1												1		1
c.173A>G	28						5		5				23		23
c.178C>T	1												1		1
c.17C>T	1						1		1
c.182C>T	1												1		1
c.188C>T	1												1		1
c.190G>T	1						1		1
c.19G>C	1												1		1
c.203C>T	1												1		1
c.240C>T	2							2	2
c.243C>T	1							1	1
c.247A>G	2												2		2
c.259C>G	3						2		2				1		1
c.262_263del	1				1				1
c.26C>T	1												1		1
c.271G>A	2						1		1				1		1
c.275G>C	1												1		1
c.321C>T	1													1	1
c.333_335del	2										2				2
c.33C>T	1													1	1
c.344C>T	1												1		1
c.348C>T	1													1	1
c.362C>A	7												7		7
c.366A>G	1							1	1
c.369C>T	1							1	1
c.37G>C	1												1		1
c.385G>A	2												2		2
c.400C>A	1												1		1
c.403G>T	94						18		18				76		76
c.409G>A	2						2		2
c.409G>C	2												2		2
c.409G>T	1												1		1
c.40C>A	1												1		1
c.421_423del	3										3				3
c.42G>A	2							2	2
c.444G>T	1													1	1
c.450G>C	1												1		1
c.451G>T	75						20		20				55		55
c.453A>C	1							1	1
c.454G>C	1												1		1
c.454G>T	1						1		1
c.456G>A	2							2	2
c.458A>C	1						1		1
c.459G>T	2						1		1				1		1
c.468G>A	1													1	1
c.498C>T	1							1	1
c.502A>C	1						1		1
c.503A>G	1												1		1
c.515A>G	1						1		1
c.518G>A	1						1		1
c.518G>T	32						6		6				26		26
c.521C>G	1						1		1
c.529G>A	6						3		3				3		3
c.538G>A	1												1		1
c.538G>T	1						1		1
c.541G>A	1												1		1
c.546A>G	1													1	1
c.547C>A	1												1		1
c.564G>A	1													1	1
c.569C>T	7						1		1				6		6
c.575A>G	1						1		1
c.577C>T	1						1		1
c.586G>T	1												1		1
c.600_602del	2										2				2
c.609C>G	1													1	1
c.611A>C	3												3		3
c.615_629del	1										1				1
c.617C>G	1												1		1
c.622C>T	1												1		1
c.632C>T	1												1		1
c.63G>A	1							1	1
c.647C>G	1												1		1
c.65A>G	2												2		2
c.662C>T	1												1		1
c.663_665del	1										1				1
c.667G>A	8						1		1				7		7
c.669C>T	1							1	1
c.671A>G	1						1		1
c.675G>T	1												1		1
c.676_678del	2				1				1		1				1
c.69G>A	1							1	1
c.71C>T	1												1		1
c.80A>G	1												1		1
c.82G>C	144	1	1				32		32				111		111
c.92C>T	4						1		1				3		3
c.A395G	1												1		1
c.G451T	1												1		1
c.G518T	1												1		1
c.G82C	1												1		1
Grand Total	584	1	1	12	13		105	17	147	12	40		372	12	436
		Missense	Total	VUS	In frame indel	Frameshift	Missense	Silent	Total	VUS	In frame indel	Frameshift	Missense	Silent	Total

## Sheet: H1-2
Supplemental File 2_ Summary of mutations in H1 family members_H1-2_Summary of array of mutations in H1-2
	Grand Total	De novo mutation		Inherited variant						Variant of unknown origin
Row Labels		Missense	Total	VUS	In frame indel	Frameshift	Missense	Silent	Total	VUS	In frame indel	Frameshift	Missense	Silent	Total
c.-16G>C	1									1					1
c.-17A>G	1			1					1
c.-18G>C	1									1					1
c.-19C>G	2			1					1	1					1
c.-29C>T	1			1					1
c.-6C>T	2									2					2
c.*11A>G	1			1					1
c.*15C>A	1			1					1
c.100A>C	1						1		1
c.101A>T	1												1		1
c.103G>A	1												1		1
c.105G>A	2							2	2
c.112C>G	1												1		1
c.115C>T	2												2		2
c.116C>T	1												1		1
c.11C>T	1												1		1
c.126G>C	1												1		1
c.12T>C	6							1	1					5	5
c.136A>C	1						1		1
c.139G>T	1												1		1
c.145G>A	2												2		2
c.147C>G	1													1	1
c.148G>T	1												1		1
c.149C>T	2						1		1				1		1
c.152C>T	2												2		2
c.154A>G	1						1		1
c.158A>G	1												1		1
c.164G>A	1												1		1
c.193G>A	5						2		2				3		3
c.194C>T	2						1		1				1		1
c.200C>T	2						1		1				1		1
c.203C>T	8						2		2				6		6
c.204C>T	1							1	1
c.20C>T	2						2		2
c.212A>G	1	1	1
c.216T>C	1													1	1
c.21C>T	1							1	1
c.222G>A	1							1	1
c.244C>T	2												2		2
c.247G>C	9						3		3				6		6
c.248G>A	1												1		1
c.259C>T	1												1		1
c.25C>G	1												1		1
c.262G>T	1												1		1
c.265A>C	4												4		4
c.267C>T	1												1		1
c.26C>T	2												2		2
c.290A>G	1												1		1
c.296C>G	1												1		1
c.296C>T	1												1		1
c.297C>T	4						1	1	2					2	2
c.305C>A	1												1		1
c.309C>G	1													1	1
c.309C>T	2						1	1	2
c.312C>T	2							2	2
c.323A>G	1												1		1
c.324_326del	1				1				1
c.325A>C	1												1		1
c.328_330delAAG	1				1				1
c.32C>T	2												2		2
c.33_35dupCGC	1				1				1
c.335C>T	2						1		1				1		1
c.336C>T	1							1	1
c.338C>G	1												1		1
c.33C>T	1													1	1
c.341G>C	1												1		1
c.346G>T	1												1		1
c.347C>G	4						1		1				3		3
c.350A>G	1												1		1
c.353C>T	2						1		1				1		1
c.357G>A	1							1	1
c.358G>C	1												1		1
c.364A>C	1												1		1
c.367G>A	4						2		2				2		2
c.368C>T	1						1		1
c.36G>T	1							1	1
c.376A>G	4						1		1				3		3
c.377C>A	1						1		1
c.37C>T	3						1		1				2		2
c.382C>T	1												1		1
c.383C>G	2						1		1				1		1
c.38C>T	1						1		1
c.390G>A	3							1	1					2	2
c.390G>T	1												1		1
c.394G>A	2												2		2
c.406A>C	1						1		1
c.408G>A	1							1	1
c.409A>G	1						1		1
c.412_420del	10				2				2		8				8
c.412_420delCCCAAGAAG	2				2				2
c.412C>G	1	1	1
c.413C>T	1												1		1
c.417G>C	1												1		1
c.41C>T	155						28		28				127		127
c.424G>C	1												1		1
c.429C>G	1									1					1
c.433G>T	1						1		1
c.434C>G	3												3		3
c.435A>C	1													1	1
c.437C>T	1												1		1
c.439C>T	1												1		1
c.440C>T	1												1		1
c.446_448del	1										1				1
c.447_470del	1										1				1
c.452C>G	1												1		1
c.456G>A	1							1	1
c.459A>C	1												1		1
c.45G>A	1												1		1
c.460A>G	2						1		1				1		1
c.468G>C	1												1		1
c.481C>T	1												1		1
c.482C>T	2						1		1				1		1
c.484G>A	6												6		6
c.496G>A	1												1		1
c.498A>C	1							1	1
c.500C>T	1						1		1
c.501C>G	19							7	7					12	12
c.504G>T	1												1		1
c.505A>C	3						1		1				2		2
c.507A>G	1							1	1
c.508dupG	1											1			1
c.511G>C	16						3		3				13		13
c.512C>T	55						11		11				44		44
c.513T>C	1						1		1
c.516G>C	1												1		1
c.517A>C	1												1		1
c.518G>A	3						1		1				2		2
c.518G>C	1												1		1
c.521C>G	1												1		1
c.525G>T	2												2		2
c.526A>C	2												2		2
c.528G>T	23						6		6				17		17
c.52G>A	2						2		2
c.531C>A	1													1	1
c.539C>T	1												1		1
c.54C>T	2							1	1					1	1
c.55C>G	4						3		3				1		1
c.564T>A	2						1		1				1		1
c.566C>T	1												1		1
c.569_570insAGC	1										1				1
c.569C>T	1												1		1
c.56C>A	1												1		1
c.56C>T	1						1		1
c.572A>C	4						2		2				2		2
c.577G>A	1												1		1
c.584C>T	2												2		2
c.590_604del	7				5				5		2				2
c.591C>T	1							1	1
c.595A>C	1												1		1
c.599C>T	2						1		1				1		1
c.603G>C	1												1		1
c.604G>A	29						8		8				21		21
c.604G>C	6						1		1				5		5
c.608T>C	1						1		1
c.612G>A	7							2	2					5	5
c.612G>C	1						1		1
c.614C>T	4						2		2				2		2
c.615_617dupTAA	3				1				1		2				2
c.617A>G	1						1		1
c.618G>C	2						1		1				1		1
c.621G>A	1													1	1
c.622G>T	1												1		1
c.633G>A	1													1	1
c.636G>C	1												1		1
c.636G>T	1						1		1
c.642G>C	2												2		2
c.67A>G	3												3		3
c.68A>C	3												3		3
c.70G>A	14						5		5				9		9
c.71C>T	7						2		2				5		5
c.72G>A	1							1	1
c.73G>A	1						1		1
c.74C>T	12	1	1				3		3				8		8
c.79A>G	1						1		1
c.81G>A	6							1	1					5	5
c.82G>A	46	1	1				10		10				35		35
c.82G>C	18						4		4				14		14
c.83C>G	1						1		1
c.84T>G	1													1	1
c.86G>C	1						1		1
c.87G>T	1							1	1
c.89G>A	2						2		2
c.90T>C	1							1	1
c.92C>G	3												3		3
c.95C>T	2												2		2
c.96T>C	1							1	1
c.9G>A	1							1	1
c.G394A	1												1		1
c.G511C	1												1		1
c.G553A	1												1		1
c.G589C	1												1		1
c.G70A	2												2		2
c.G82A	1												1		1
Grand Total	714	4	4	6	13		141	35	195	6	15	2	450	41	514
		Missense	Total	VUS	In frame indel	Frameshift	Missense	Silent	Total	VUS	In frame indel	Frameshift	Missense	Silent	Total

## Sheet: H1-3
Supplemental File 2_ Summary of mutations in H1 family members_H1-3_Summary of array of mutations in H1-3
	Grand Total	Inherited variant						Variant of unknown origin
Row Labels		VUS	In frame indel	Frameshift	Missense	Silent	Total	VUS	In frame indel	Frameshift	Missense	Silent	Total
c.-12delG	1	1					1
c.-12G>A	4							4					4
c.-21C>T	1							1					1
c.-22_-13del	1							1					1
c.-44G>A	1	1					1
c.-9G>A	3							3					3
c.*11A>G	2	2					2
c.*12C>G	1							1					1
c.*12C>T	1	1					1
c.*18C>T	1							1					1
c.*9G>C	1	1					1
c.104A>G	1										1		1
c.107C>T	1										1		1
c.109T>G	1										1		1
c.10A>C	1										1		1
c.10A>T	1				1		1
c.118C>G	9				3		3				6		6
c.119C>T	1				1		1
c.11C>T	3										3		3
c.121G>A	99				20		20				79		79
c.127G>A	1										1		1
c.136A>C	1				1		1
c.142G>A	1										1		1
c.144A>G	36					6	6					30	30
c.148G>A	1				1		1
c.149C>T	1				1		1
c.151G>T	1										1		1
c.152C>T	2				1		1				1		1
c.155C>T	1										1		1
c.158A>G	2										2		2
c.159G>A	13					1	1					12	12
c.164G>A	2										2		2
c.165C>T	1											1	1
c.170G>A	3										3		3
c.176C>T	2										2		2
c.178C>T	1											1	1
c.182C>T	1										1		1
c.184G>A	1										1		1
c.186G>T	2					1	1					1	1
c.197C>T	1										1		1
c.19C>G	1										1		1
c.203C>T	2				1		1				1		1
c.205G>A	7				1		1				6		6
c.206C>T	26				3		3				23		23
c.208G>A	5				1		1				4		4
c.209C>T	2										2		2
c.212G>C	3				1		1				2		2
c.213C>T	1					1	1
c.220G>A	1										1		1
c.223G>A	4										4		4
c.22G>T	1										1		1
c.231C>T	2				1	1	2
c.233_235del	1								1				1
c.236G>A	1										1		1
c.23C>T	2										2		2
c.252C>T	2					1	1					1	1
c.253C>G	4				2		2				2		2
c.258G>A	2											2	2
c.25C>T	4				3		3				1		1
c.266T>C	1										1		1
c.282G>A	2					2	2
c.282G>C	1					1	1
c.283G>A	5				1		1				4		4
c.28A>G	2				1		1				1		1
c.295G>A	1										1		1
c.302G>A	1										1		1
c.31A>G	1										1		1
c.327C>T	2					1	1					1	1
c.32T>C	12										12		12
c.333A>C	2				2		2
c.333A>G	1					1	1
c.333A>T	1										1		1
c.335C>T	1				1		1
c.338C>T	4				1		1				3		3
c.342C>T	1											1	1
c.343G>A	1				1		1
c.34C>T	4				3		3				1		1
c.355C>T	1										1		1
c.361G>A	1										1		1
c.362C>G	1										1		1
c.365A>G	18				5		5				13		13
c.371C>G	7				3		3				4		4
c.376G>A	1				1		1
c.378A>C	1											1	1
c.37G>A	2										2		2
c.388_389insCTA	59		14				14		45				45
c.389_390insCTA	36								36				36
c.394C>T	2				1		1				1		1
c.401G>A	1										1		1
c.401G>T	2				1		1				1		1
c.414G>A	1					1	1
c.415_423del	1								1				1
c.416C>T	2										2		2
c.421A>C	1										1		1
c.425_427delTGG	1								1				1
c.425T>C	2										2		2
c.428C>T	1										1		1
c.432C>T	1					1	1
c.436G>C	57				14		14				43		43
c.437C>T	2										2		2
c.43G>A	3										3		3
c.440C>T	1				1		1
c.443C>T	2										2		2
c.453C>A	1										1		1
c.464_472dupCTCCTAAGA	1								1				1
c.465T>C	2											2	2
c.472_473insCTCCTAAGA	2		1				1		1				1
c.472A>C	1				1		1
c.473_474insCTCCTAAGA	1								1				1
c.474G>C	1				1		1
c.476T>C	1				1		1
c.477A>G	3											3	3
c.487G>A	5										5		5
c.489A>C	1					1	1
c.490A>G	1										1		1
c.493G>T	2										2		2
c.494C>G	23				4		4				19		19
c.495T>A	1											1	1
c.497C>T	3										3		3
c.517A>G	1										1		1
c.51A>T	1										1		1
c.526A>G	1										1		1
c.532G>C	5										5		5
c.535A>C	1										1		1
c.541C>T	2				1		1				1		1
c.542C>T	2				1		1				1		1
c.544C>G	2										2		2
c.548C>T	1										1		1
c.549A>C	2											2	2
c.54A>G	2					2	2
c.551A>G	1										1		1
c.554_556del	101		21				21		80				80
c.563A>G	1										1		1
c.564G>A	16					1	1					15	15
c.566G>A	1										1		1
c.56C>G	1										1		1
c.571G>C	1										1		1
c.574A>C	1										1		1
c.574A>G	1				1		1
c.587C>T	1										1		1
c.591G>C	1										1		1
c.608C>G	1				1		1
c.608C>T	1				1		1
c.612G>A	2											2	2
c.616G>A	1										1		1
c.621G>T	1										1		1
c.627G>A	1					1	1
c.62A>G	11				1		1				10		10
c.62A>T	1										1		1
c.631A>G	6				1		1				5		5
c.641A>G	3										3		3
c.645_647dupGGC	1		1				1
c.646G>C	9				3		3				6		6
c.647_648insGGC	2		1				1		1				1
c.647C>T	1										1		1
c.648_649insGGC	1								1				1
c.650C>T	1										1		1
c.653C>A	2				2		2
c.653C>G	3				1		1				2		2
c.653C>T	1										1		1
c.66_74del	1								1				1
c.71C>T	1										1		1
c.72G>A	4					3	3					1	1
c.74A>G	2										2		2
c.75G>A	5					2	2					3	3
c.78G>A	1											1	1
c.80C>A	1										1		1
c.82G>A	1										1		1
c.84C>T	1											1	1
c.85G>A	1										1		1
c.88A>G	1										1		1
c.94G>A	9				2		2				7		7
c.95G>C	1										1		1
c.G121A	4										4		4
c.G556A	1										1		1
Grand Total	808	6	38		100	28	172	11	170		372	82	635
		VUS	In frame indel	Frameshift	Missense	Silent	Total	VUS	In frame indel	Frameshift	Missense	Silent	Total

## Sheet: H1.4
Supplemental File 2_ Summary of mutations in H1 family members_H1-4_Summary of array of mutations in H1-4
	Grand Total	De Novo mutation						Inherited variant						Variant of unknown origin
		VUS	In frame indel	Frameshift	Missense	Silent	Total	VUS	In frame indel	Frameshift	Missense	Silent	Total	VUS	In frame indel	Frameshift	Missense	Silent	Total
c.-14C>G	1													1					1
c.-1C>T	1													1					1
c.-20C>A	1							1					1
c.-20C>G	1							1					1
c.-20C>T	1							1					1
c.-3A>G	1							1					1
c.-54G>C	1							1					1
c.-6T>C	1													1					1
c.*15C>T	2													2					2
c.*17A>C	1							1					1
c.*18C>T	1							1					1
c.*19T>C	1							1					1
c.*37_*40dupAACC	1													1					1
c.100_101insT	1									1			1
c.105G>A	3											2	2					1	1
c.105G>T	12											2	2					10	10
c.114C>T	1											1	1
c.117G>A	1																	1	1
c.11C>T	2										2		2
c.134C>T	2																2		2
c.139G>A	5										1		1				4		4
c.140C>T	49										8		8				41		41
c.147C>T	1											1	1
c.148G>A	3										1		1				2		2
c.14C>T	1																1		1
c.15G>A	1																1		1
c.15G>C	1										1		1
c.169_170insT	1															1			1
c.171A>G	2											1	1					1	1
c.194C>T	1										1		1
c.1A>G	1	1					1
c.203C>T	2										1		1				1		1
c.204C>A	2											2	2
c.20C>T	1																1		1
c.225G>C	2																2		2
c.228C>T	2											2	2
c.237C>T	1											1	1
c.244C>G	1										1		1
c.252C>T	1											1	1
c.257G>A	1										1		1
c.259C>T	2																	2	2
c.265del	1															1			1
c.271G>A	1																1		1
c.275C>T	4										3		3				1		1
c.276C>G	2											1	1					1	1
c.279G>A	1																	1	1
c.280G>C	3										1		1				2		2
c.282G>A	1																	1	1
c.312C>A	1											1	1
c.312C>T	6											2	2					4	4
c.319C>T	1																1		1
c.324C>T	1																	1	1
c.328A>G	3																3		3
c.329A>C	3																3		3
c.32C>T	1																1		1
c.332C>T	3																3		3
c.334G>A	2																2		2
c.334G>C	1																1		1
c.335C>T	22										6		6				16		16
c.338C>T	1										1		1
c.339T>C	1																	1	1
c.341G>A	1																1		1
c.347C>T	1										1		1
c.350A>G	1																1		1
c.352C>G	1																1		1
c.352C>T	1																1		1
c.358G>A	1										1		1
c.366G>C	1																1		1
c.368C>T	1																1		1
c.372C>T	4											1	1					3	3
c.373_399del	1														1				1
c.373G>A	1																1		1
c.374C>G	1																1		1
c.374C>T	1																1		1
c.376G>A	1																1		1
c.377C>T	2																2		2
c.382G>T	1																1		1
c.383_412del	1														1				1
c.387G>C	4										1		1				3		3
c.38C>T	1										1		1
c.394G>A	1																1		1
c.395C>T	1																1		1
c.398G>C	1																1		1
c.405G>C	1																	1	1
c.412C>T	1										1		1
c.412dupC	1															1			1
c.420G>A	1											1	1
c.421G>A	1																1		1
c.421G>C	1																1		1
c.422C>T	1																1		1
c.423G>A	1																	1	1
c.424A>T	1																1		1
c.425C>T	1										1		1
c.428G>C	1																1		1
c.431C>T	45										12		12				33		33
c.437C>T	4										3		3				1		1
c.438_449del	1														1				1
c.441C>T	3											3	3
c.447dupG	1			1			1
c.449G>C	2																2		2
c.44C>T	1																1		1
c.451G>A	1																1		1
c.451G>T	1																1		1
c.455A>G	110										20		20				90		90
c.45C>T	1														1				1
c.467A>G	1																1		1
c.469_471del	1								1				1
c.473C>T	4										1		1				3		3
c.481C>G	1																1		1
c.481C>T	2																2		2
c.482C>T	3				1		1				1		1				1		1
c.485C>G	1																1		1
c.490G>A	2										1		1				1		1
c.490G>C	1																1		1
c.496G>A	1																1		1
c.497G>C	1																1		1
c.499G>A	1																1		1
c.49A>G	1																1		1
c.500C>T	1																1		1
c.501C>T	3											2	2					1	1
c.502A>C	1																1		1
c.506_508delAAG	1								1				1
c.508G>A	1																1		1
c.509_549del	1			1			1
c.509C>T	4										1		1				3		3
c.518C>T	2										1		1				1		1
c.51G>A	1																	1	1
c.526G>C	1										1		1
c.527C>G	2										1		1				1		1
c.527C>T	1																1		1
c.533C>T	4										1		1				3		3
c.539A>C	1																1		1
c.541C>T	1																1		1
c.543A>G	1																	1	1
c.547_549del	1														1				1
c.548A>G	1																1		1
c.549G>C	1										1		1
c.550G>A	1																1		1
c.553C>A	2																2		2
c.558G>A	2											1	1					1	1
c.55C>G	1																1		1
c.55C>T	1																1		1
c.56C>T	1																1		1
c.577G>A	11										4		4				7		7
c.586C>T	1																1		1
c.587C>T	2				1		1										1		1
c.588C>T	1																	1	1
c.5C>G	2																2		2
c.60_62del	2														2				2
c.602C>T	1																1		1
c.606G>A	19											1	1					18	18
c.607A>T	1																1		1
c.609C>T	1																	1	1
c.60G>A	1																	1	1
c.610G>A	9																9		9
c.612C>T	1																	1	1
c.613A>C	2										1		1				1		1
c.633A>G	1																1		1
c.634A>C	1																1		1
c.641C>T	1																1		1
c.645A>T	5											3	3					2	2
c.653A>G	1																1		1
c.654A>G	5											5	5
c.67_69del	2								2				2
c.68A>G	2																2		2
c.83C>A	1																1		1
c.89C>G	1																1		1
c.89C>T	5										1		1				4		4
c.91G>A	1																1		1
c.92C>T	2																2		2
c.93C>G	2											1	1					1	1
c.93C>T	1																	1	1
c.A455G	1																1		1
Grand Total	531	1		2	2		5	8	4	1	84	35	132	6	7	3	317	59	392
		VUS	In frame indel	Frameshift	Missense	Silent	Total	VUS	In frame indel	Frameshift	Missense	Silent	Total	VUS	In frame indel	Frameshift	Missense	Silent	Total
